# Supplementary material for: Understanding the relative importance of vertical and horizontal flow in ice-wedge polygons
Source: Copernicus journal article supplement (doi:10.5194/hess-24-1109-2020), 2020-03-10
Supplement: Supplementary file [file hess-24-1109-2020-supplement-title-page.pdf › hess-24-1109-2020-supplement-title-page.pdf]

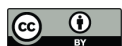

## *Supplement of*

# **Understanding the relative importance of vertical and horizontal flow in ice-wedge polygons**

**Nathan A. Wales et al.**

*Correspondence to:* Nathan A. Wales ([nathanwales@gmail.com](mailto:nathanwales@gmail.com))

- [hess-24-1109-2020-supplement-title-page.pdf](#)
- [Suplimentary\\_Info\\_Wales](#)
  - [Table\\_2\\_FT\\_depths\\_LCP.jpg](#)
  - [Table\\_3\\_FT\\_depths\\_HCP.jpg](#)
  - [Talble\\_1\\_paratmeters\\_literature.jpg](#)

The copyright of individual parts of the supplement might differ from the CC BY 4.0 License.
